# Supplementary material
Source: PubMed Central journal article supplement (PMC4187967)
Supplement: AAC.03205-14_zac010143274so1.pdf [file AAC.03205-14_zac010143274so1.pdf]

## Appendix

### **A simple and rapid method to determine antimycobacterial potency of compounds using autoluminescent *Mycobacterium tuberculosis***

Sreevalli Sharma<sup>1§</sup>, Ekaterina Gelman<sup>2§</sup>, Chandan Narayan<sup>1+#</sup>, Deepa Bhattacharjee<sup>1+</sup>,  
Vijayashree Achar<sup>1</sup>, Vaishali Humnabadkar<sup>1</sup>, V. Balasubramanian<sup>1□</sup>, Vasanthi  
Ramachandran<sup>1</sup>, Neeraj Dhar<sup>2\*</sup> and Neela Dinesh<sup>1\*</sup>

<sup>1</sup>AstraZeneca India Pvt. Ltd., Bellary Road, Hebbal, Bangalore 560024, India

<sup>2</sup> Global Health Institute, École polytechnique fédérale de Lausanne (EPFL) Station 19, CH-  
1015 Lausanne Switzerland

**Running title:** rapid method to determine antimycobacterial potency

#current affiliation: Pohang University of Science and Technology,

□current affiliation: Cell Works Research India Pvt. Ltd.,

§,†equal contributors,

\*Corresponding authors

email: [neeraj.dhar@epfl.ch](mailto:neeraj.dhar@epfl.ch), [neeladin@gmail.com](mailto:neeladin@gmail.com)

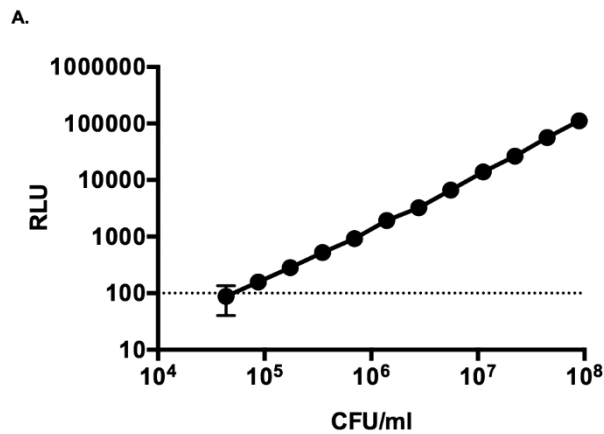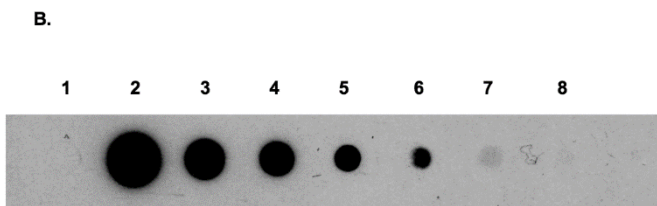

**Figure S1. Sensitivity of lux reporter in *M. smegmatis*.** Luminescence was measured using series of 2-fold dilutions of Msm-lux strain in 1X PBS. CFU number was determined in parallel by plating aliquots of serial dilutions on LB solid agar medium. Data shown represents mean + SD (n= 3). Luminescence signal was detected in a microplate reader in luminescence mode (A) or by exposure to ECL luminescence film using a Bio-Rad vacuum-driven Bio-dot system (B). Spot 1 corresponds to PBS control and spots 2-8 represent 2-fold dilutions of Msm-lux strain starting from  $1.75 \times 10^9$  CFU in spot 2 (in 100  $\mu$ l). Dotted line indicates the background luminescence.

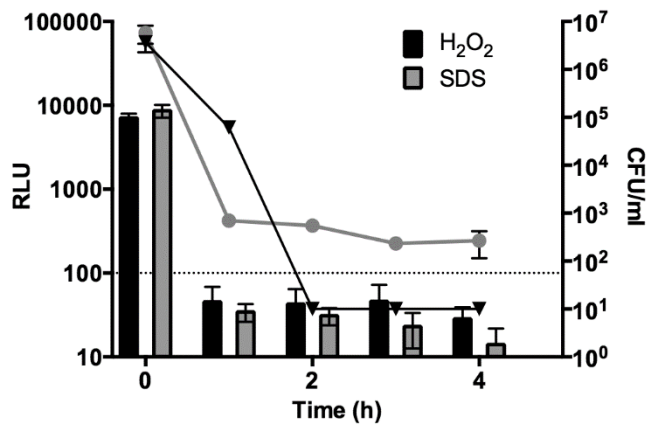

**Figure S2. Msm-lux reporter sensitivity to SDS and peroxide stresses.** Msm-lux reporter strain expressing luciferase was grown to  $OD_{600}=0.05$  in 7H9 complete medium followed by a subsequent exposure to 10 mM  $H_2O_2$  or 1% SDS. Luminescence was measured at various time points using a microplate reader. CFU was determined by plating on 7H10-agar and is plotted on the right y-axis. Data shown represents mean + SD of 3 independent cultures. Dotted line indicates the background luminescence.
